# Supplementary material
Source: PubMed Central journal article supplement (PMC6688902)
Supplement: NIHMS1525275-supplement-1.pdf [file NIHMS1525275-supplement-1.pdf]

**Table E1. Fecal metabolites significantly different between subjects with asthma (n=85) vs no asthma (n=276, reference group) ( $p < 0.05$ ) at age 3 years.** Metabolites are grouped by metabolic subpathway, in order of decreasing significance of the most significant metabolite in that subpathway.

| Metabolite                                            | Pathway     | Subpathway                 | Odds Ratio<br>(95% Confidence Interval) | p value       | Including Steroid Use<br>in Model       |         |
|-------------------------------------------------------|-------------|----------------------------|-----------------------------------------|---------------|-----------------------------------------|---------|
|                                                       |             |                            |                                         |               | Odds Ratio<br>(95% Confidence Interval) | p value |
| Docosapentaenoate (n6 DPA; 22:5n6)                    | Lipid       | Polyunsaturated Fatty Acid | 0.56 (0.40, 0.76)                       | <b>0.0004</b> | 0.56 (0.43, 0.83)                       | 0.002   |
| Linoleate (18:2n6)                                    | Lipid       | Polyunsaturated Fatty Acid | 0.64 (0.42, 0.98)                       | 0.039         | 0.62 (0.39, 0.98)                       | 0.040   |
| Adrenate (22:4n6)                                     | Lipid       | Polyunsaturated Fatty Acid | 0.72 (0.52, 1.00)                       | 0.047         | 0.67 (0.47, 0.96)                       | 0.029   |
| Dcosapentaenoate (n3 DPA; 22:5n3)                     | Lipid       | Polyunsaturated Fatty Acid | 0.72 (0.51, 1.00)                       | 0.050         | 0.63 (0.44, 0.92)                       | 0.015   |
| P-cresol sulfate                                      | Amino Acid  | Tyrosine Metabolism        | 0.56 (0.40, 0.79)                       | <b>0.001</b>  | 0.57 (0.39, 0.82)                       | 0.003   |
| O-sulfo-L-tyrosine                                    | Amino Acid  | Tyrosine Metabolism        | 0.67 (0.48, 0.92)                       | 0.014         | 0.62 (0.43, 0.87)                       | 0.007   |
| Phenol sulfate                                        | Amino Acid  | Tyrosine Metabolism        | 0.69 (0.51, 0.93)                       | 0.015         | 0.71 (0.51, 0.98)                       | 0.043   |
| Cis-4-hydroxycyclohexylacetic acid                    | Amino Acid  | Tyrosine Metabolism        | 0.65 (0.44, 0.97)                       | 0.033         | 0.60 (0.39, 0.93)                       | 0.021   |
| Palmitoyl-oleoyl-glycerol (16:0/18:1) [1]*            | Lipid       | Diacylglycerol             | 0.59 (0.42, 0.83)                       | <b>0.002</b>  | 0.67 (0.47, 0.97)                       | 0.032   |
| Palmitoyl-oleoyl-glycerol (16:0/18:1) [2]*            | Lipid       | Diacylglycerol             | 0.55 (0.37, 0.80)                       | <b>0.002</b>  | 0.61 (0.40, 0.93)                       | 0.021   |
| Oleoyl-oleoyl-glycerol (18:1/18:1) [1]*               | Lipid       | Diacylglycerol             | 0.64 (0.47, 0.86)                       | 0.003         | 0.71 (0.51, 0.97)                       | 0.034   |
| Diacylglycerol (14:0/18:1, 16:0/16:1) [1]*            | Lipid       | Diacylglycerol             | 0.61 (0.43, 0.85)                       | 0.004         | 0.66 (0.45, 0.94)                       | 0.024   |
| Oleoyl-oleoyl-glycerol (18:1/18:1) [2]*               | Lipid       | Diacylglycerol             | 0.68 (0.52, 0.88)                       | 0.004         | 0.71 (0.53, 0.95)                       | 0.019   |
| Diacylglycerol (12:0/18:1, 14:0/16:1, 16:0/14:1) [2]* | Lipid       | Diacylglycerol             | 0.64 (0.45, 0.88)                       | 0.007         | 0.66 (0.46, 0.94)                       | 0.025   |
| Diacylglycerol (12:0/18:1, 14:0/16:1, 16:0/14:1) [1]* | Lipid       | Diacylglycerol             | 0.53 (0.32, 0.82)                       | 0.008         | 0.56 (0.33, 0.90)                       | 0.025   |
| Diacylglycerol (16:1/18:2 [2], 16:0/18:3 [1])*        | Lipid       | Diacylglycerol             | 0.71 (0.53, 0.94)                       | 0.017         | 0.71 (0.52, 0.97)                       | 0.030   |
| Oleoyl-linoleoyl-glycerol (18:1/18:2) [1]             | Lipid       | Diacylglycerol             | 0.71 (0.52, 0.96)                       | 0.029         | 0.72 (0.51, 1.00)                       | 0.055   |
| Linoleoyl-linolenoyl-glycerol (18:2/18:3) [2]*        | Lipid       | Diacylglycerol             | 0.74 (0.56, 0.97)                       | 0.031         | 0.77 (0.57, 1.05)                       | 0.100   |
| 17alpha-hydroxypregnenolone 3-sulfate                 | Lipid       | Pregnenolone Steroids      | 0.63 (0.47, 0.85)                       | <b>0.002</b>  | 0.60 (0.43, 0.83)                       | 0.002   |
| 12,13-DiHOME                                          | Lipid       | Fatty Acid, Dihydroxy      | 0.60 (0.41, 0.88)                       | 0.008         | 0.57 (0.38, 0.86)                       | 0.007   |
| 1-myristoylglycerol (14:0)                            | Lipid       | Monoacylglycerol           | 0.56 (0.36, 0.86)                       | 0.010         | 0.52 (0.31, 0.84)                       | 0.009   |
| Octadecenedioate (C18:1-DC)                           | Lipid       | Fatty Acid, Dicarboxylate  | 0.63 (0.44, 0.90)                       | 0.011         | 0.60 (0.40, 0.89)                       | 0.011   |
| Galactosylglycerol*                                   | Lipid       | Glycolipid Metabolism      | 0.65 (0.46, 0.90)                       | 0.011         | 0.68 (0.47, 0.97)                       | 0.038   |
| 2,8-quinolinediol                                     | Xenobiotics | Food/Plant                 | 0.70 (0.53, 0.92)                       | 0.012         | 0.72 (0.53, 0.96)                       | 0.028   |
| Pyrraline                                             | Xenobiotics | Food/Plant                 | 0.64 (0.44, 0.92)                       | 0.019         | 0.64 (0.43, 0.96)                       | 0.032   |
| Stachydrine                                           | Xenobiotics | Food/Plant                 | 0.70 (0.50, 0.97)                       | 0.037         | 0.62 (0.43, 0.90)                       | 0.012   |
| 3,5-dihydroxybenzoic acid                             | Xenobiotics | Food/Plant                 | 0.67 (0.45, 0.98)                       | 0.041         | 0.74 (0.48, 1.13)                       | 0.170   |
| Sitostanol                                            | Xenobiotics | Food/Plant                 | 1.32 (1.01, 1.76)                       | 0.047         | 1.45 (1.06, 2.00)                       | 0.022   |
| Pyroglutamyl-leucine*                                 | Peptide     | Dipeptide                  | 0.57 (0.36, 0.88)                       | 0.012         | 0.55 (0.34, 0.88)                       | 0.014   |

|                                               |                        |                                        |                   |       |                   |       |
|-----------------------------------------------|------------------------|----------------------------------------|-------------------|-------|-------------------|-------|
| Linoleoyl ethanolamide                        | Lipid                  | Endocannabinoid                        | 0.69 (0.51, 0.93) | 0.014 | 0.67 (0.49, 0.93) | 0.016 |
| Oleoyl ethanolamide                           | Lipid                  | Endocannabinoid                        | 0.66 (0.46, 0.94) | 0.022 | 0.65 (0.44, 0.97) | 0.035 |
| Palmitoyl ethanolamide                        | Lipid                  | Endocannabinoid                        | 0.67 (0.46, 0.97) | 0.037 | 0.66 (0.43, 0.99) | 0.050 |
| Stearoyl ethanolamide                         | Lipid                  | Endocannabinoid                        | 0.66 (0.44, 0.98) | 0.042 | 0.64 (0.41, 0.99) | 0.048 |
| 11-ketoetiocholanolone sulfate                | Lipid                  | Androgenic Steroids                    | 0.68 (0.50, 0.93) | 0.016 | 0.66 (0.46, 0.93) | 0.018 |
| Xylose                                        | Carbohydrate           | Pentose Metabolism                     | 0.66 (0.47, 0.94) | 0.022 | 0.63 (0.42, 0.93) | 0.020 |
| Homocitrulline                                | Amino Acid             | Urea Cycle                             | 0.65 (0.45, 0.95) | 0.026 | 0.61 (0.41, 0.91) | 0.017 |
| Cysteinylglycine                              | Amino Acid             | Glutathione Metabolism                 | 1.42 (1.04, 1.94) | 0.026 | 1.37 (0.97, 1.93) | 0.074 |
| Ursodeoxycholate sulfate (1)                  | Lipid                  | Secondary Bile Acid                    | 0.73 (0.54, 0.96) | 0.027 | 0.69 (0.50, 0.94) | 0.022 |
| Cysteine s-sulfate                            | Amino Acid             | Methionine and Cysteine Metabolism     | 0.58 (0.36, 0.94) | 0.028 | 0.52 (0.30, 0.88) | 0.015 |
| Palmitoleate (16:1n7)                         | Lipid                  | Long Chain Fatty Acid                  | 0.57 (0.34, 0.93) | 0.029 | 0.48 (0.26, 0.83) | 0.011 |
| Lactosyl-N-behenoyl-sphingosine (d18:1/22:0)* | Lipid                  | Sphingolipid Metabolism                | 0.69 (0.48, 0.96) | 0.032 | 0.59 (0.38, 0.86) | 0.009 |
| 3-hydroxypyridine                             | Xenobiotics            | Chemical                               | 1.59 (1.05, 2.46) | 0.033 | 1.76 (1.11, 2.90) | 0.021 |
| Lactosyl-N-palmitoyl-sphingosine (d18:1/16:0) | Lipid                  | Ceramides                              | 0.73 (0.55, 0.97) | 0.034 | 0.70 (0.51, 0.95) | 0.025 |
| Trigonelline (N'-methylnicotinate)            | Cofactors and Vitamins | Nicotinate and Nicotinamide Metabolism | 0.73 (0.54, 0.99) | 0.045 | 0.73 (0.52, 1.02) | 0.062 |
| PAHSA (16:0/OH-18:0)                          | Lipid                  | Fatty Acid Hydroxyl Fatty Acid         | 0.75 (0.56, 1.00) | 0.046 | 0.81 (0.59, 1.11) | 0.180 |

Logistic regression analyses were adjusted for sex, race/ethnicity, study center, maternal education and gestational age.

Steroid use includes parent-reported inhaled or systemic steroid use in the three months prior to the age 3 years study visit.

\*Indicates compounds with annotations that have not been officially confirmed based on a standard.

Bolded *p* values were significant after corrected for multiple testing by method of number of effective tests, as described in Methods.

**Table E2. Modules of highly correlated intestinal metabolites.** Ten of the 737 metabolites did not cluster into a module. \*Indicates compounds with annotations that have not been officially confirmed based on a standard.

| Module 1                                                  | Module 5                                | Module 8                            |
|-----------------------------------------------------------|-----------------------------------------|-------------------------------------|
| 1,2-dilinolenoyl-galactosylglycerol (18:3/18:3)*          | tauroursodeoxycholate                   | guanosine                           |
| 1-palmitoyl-2-linoleoyl-digalactosylglycerol (16:0/18:2)* | taurocholate                            | adenosine                           |
| 1,2-dilinoleoyl-galactosylglycerol (18:2/18:2)*           | taurine                                 | 2'-deoxyguanosine                   |
| 1,2-dilinoleoyl-digalactosylglycerol (18:2/18:2)*         | N-acetyltaurine                         | inosine                             |
| 1-linoleoyl-2-linolenoyl-galactosylglycerol (18:2/18:3)*  | taurochenodeoxycholate                  | arginine                            |
| 1-palmitoyl-2-linoleoyl-galactosylglycerol (16:0/18:2)*   | <b>Module 6</b>                         | 3-hydroxybenzoate                   |
| pheophorbide A                                            | vanillate                               | asparagine                          |
| <b>Module 2</b>                                           | S-methylmethionine                      | argininosuccinate                   |
| palmitoyl-oleoyl-glycerol (16:0/18:1) [2]*                | glycoursodeoxycholate                   | mevalonate                          |
| oleoyl-oleoyl-glycerol (18:1/18:1) [2]*                   | 7-ketodeoxycholate                      | cytidine                            |
| diacylglycerol (14:0/18:1, 16:0/16:1) [1]*                | glycolithocholate sulfate*              | 2'-deoxyadenosine                   |
| oleoyl-oleoyl-glycerol (18:1/18:1) [1]*                   | biliverdin                              | 2'-deoxycytidine                    |
| palmitoyl-oleoyl-glycerol (16:0/18:1) [1]*                | glycochenodeoxycholate                  | guanine                             |
| diacylglycerol (16:1/18:2 [2], 16:0/18:3 [1])*            | 3b-hydroxy-5-cholenoic acid             | adenine                             |
| diacylglycerol (12:0/18:1, 14:0/16:1, 16:0/14:1) [2]*     | glycocholate                            | 4-guanidinobutanoate                |
| diacylglycerol (12:0/18:1, 14:0/16:1, 16:0/14:1) [1]*     | 7-ketolithocholate                      | 7-methylguanine                     |
| oleoyl-linoleoyl-glycerol (18:1/18:2) [1]                 | 3-hydroxyhexanoate                      | agmatine                            |
| linoleoyl-linolenoyl-glycerol (18:2/18:3) [2]*            | cholate                                 | xanthosine                          |
| linoleoyl-linoleoyl-glycerol (18:2/18:2) [1]*             | 2-hydroxyadipate                        | homoarginine                        |
| linoleoyl-linoleoyl-glycerol (18:2/18:2) [2]*             | sucrose                                 | 2-isopropylmalate                   |
| palmitoyl-linolenoyl-glycerol (16:0/18:3) [2]*            | N-glycolylneuraminic acid               | uridine                             |
| palmitoyl-linoleoyl-glycerol (16:0/18:2) [1]*             | N-acetylproline                         | 8-hydroxyguanine                    |
| palmitoleoyl-linoleoyl-glycerol (16:1/18:2) [1]*          | syringic acid                           | 2,3-dihydroxyisovalerate            |
| linolenoyl-linolenoyl-glycerol (18:3/18:3) [2]*           | chenodeoxycholate                       | 2-oxoarginine*                      |
| oleoyl-linoleoyl-glycerol (18:1/18:2) [2]                 | genistein                               | 4-hydroxybenzoate                   |
| diacylglycerol (14:0/18:1, 16:0/16:1) [2]*                | 12-dehydrocholate                       | nicotianamine                       |
| oleoyl-linolenoyl-glycerol (18:1/18:3) [2]*               | tetrahydrocortisol                      | malonate                            |
| linolenoyl-linolenoyl-glycerol (18:3/18:3) [1]*           | cortolone                               | 2'-deoxyinosine                     |
| 13-HODE + 9-HODE                                          | bilirubin (Z,Z)                         | N6-carbamoylthreonyladenosine       |
| tartarate                                                 | vanillactate                            | thymidine                           |
| palmitoyl-linoleoyl-glycerol (16:0/18:2) [2]*             | digalacturonic acid                     | 5-methyluridine (ribothymidine)     |
| 13-HOTrE                                                  | 4-hydroxyphenylacetate                  | 2'-deoxyuridine                     |
| <b>Module 3</b>                                           | quininate                               | <b>Module 9</b>                     |
| 21-hydroxypregnenolone monosulfate (1)                    | taurocholate sulfate                    | 5-(2-Hydroxyethyl)-4-methylthiazole |
| pregn steroid monosulfate*                                | glycerophosphoserine*                   | xanthine                            |
| pregnen-diol disulfate*                                   | 3-dehydrocholate                        | glutamate, gamma-methyl ester       |
| dehydroisoandrosterone sulfate (DHEA-S)                   | glycocholate sulfate*                   | diaminopimelate                     |
| pregnenolone sulfate                                      | saccharin                               | thymine                             |
| androstenediol (3beta,17beta) monosulfate (1)             | 7,12-diketolithocholate                 | nicotinate ribonucleoside           |
| 5alpha-pregnan-3beta,20alpha-diol disulfate               | 3-hydroxyisobutyrate                    | fumarate                            |
| androstenediol (3beta,17beta) disulfate (2)               | maltotetraose                           | gamma-glutamyl-2-aminobutyrate      |
| androstenediol (3beta,17beta) disulfate (1)               | maltitol/lactitol/cellobiotol/palatinol | glutamyl-meso-diaminopimelate       |
| <b>Module 4</b>                                           | <b>Module 7</b>                         | uracil                              |
| lactosyl-N-behenoyl-sphingosine (d18:1/22:0)*             | carotene diol (2)                       | 1-methyladenine                     |
| lactosyl-N-palmitoyl-sphingosine (d18:1/16:0)             | carotene diol (3)                       | hydroxymethylpyrimidine             |
| lactosyl-N-nervonoyl-sphingosine (d18:1/24:1)*            | beta-cryptoxanthin                      | flavin adenine dinucleotide (FAD)   |
| palmitoyl dihydrosphingomyelin (d18:0/16:0)*              | carotene diol (1)                       | N-acetylmuramate                    |
| palmitoyl sphingomyelin (d18:1/16:0)                      | 2-oxindole-3-acetate                    | pseudouridine                       |
| glycosyl-N-palmitoyl-sphingosine (d18:1/16:0)             |                                         | sedoheptulose                       |
| glycosyl-N-stearoyl-sphingosine (d18:1/18:0)              |                                         | malate                              |
| 7-hydroxycholesterol (alpha or beta)                      |                                         |                                     |

**Table E2 (Continued)**

| <b>Module 10</b>                 | <b>Module 15</b>                                   | <b>Module 19</b>                    |
|----------------------------------|----------------------------------------------------|-------------------------------------|
| xylose                           | p-cresol sulfate                                   | stachydrine                         |
| galactosylglycerol*              | O-sulfo-L-tyrosine                                 | 2,4-dihydroxyhydrocinnamate         |
| ferulate                         | phenol sulfate                                     | epicatechin                         |
| ribose/xylulose                  | 2,8-quinolinediol                                  | apigenin                            |
| arabinose                        | alpha-CEHC sulfate                                 | ponciretin                          |
| maltose                          | 4-methylcatechol sulfate                           | salicylate                          |
| glucose                          | furaneol sulfate                                   | 3-hydroxy-3-methylglutarate         |
| glucuronate                      | catechol sulfate                                   | hesperetin                          |
| fructose                         | pyridoxine (Vitamin B6)                            | naringenin                          |
| galacturonate                    | 2-aminophenol sulfate                              | chiro-inositol                      |
| mannose                          | homovanillate sulfate                              | 2,4,6-trihydroxybenzoate            |
| dihydroferulic acid              | <b>Module 16</b>                                   | 2-aminophenol                       |
| maltotriose                      | eicosanoylsphingosine (d20:1)*                     | <b>Module 20</b>                    |
| <b>Module 11</b>                 | N-acetylsphingosine                                | p-cresol                            |
| oleoyl ethanolamide              | N-2-hydroxypalmitoyl-sphingosine (d18:1/16:0(2OH)) | N-acetylalanine                     |
| 12,13-DiHOME                     | hexadecasphinganine (d16:0)*                       | valerylphenylalanine                |
| linoleoyl ethanolamide           | ceramide (d18:1/14:0, d16:1/16:0)*                 | N-acetylphenylalanine               |
| stearoyl ethanolamide            | heptadecasphingosine (d17:1)                       | 3-phenylpropionate (hydrocinnamate) |
| palmitoyl ethanolamide           | N-palmitoyl-sphingosine (d18:1/16:0)               | indole                              |
| arachidoyl ethanolamide (20:0)*  | N-butyroyl-sphingosine (d18:1/4:0)                 | N-acetylvaline                      |
| 5-methylthioadenosine (MTA)      | N-palmitoyl-sphinganine (d18:0/16:0)               | phenylpropionylglycine              |
| erucoyl ethanolamide (22:1)*     | sphingosine                                        | valerylglycine                      |
| margaroyl ethanolamide*          | N-stearoyl-sphingosine (d18:1/18:0)*               | 2-hydroxyphenylacetate              |
| 9,10-DiHOME                      | hexadecasphingosine (d16:1)*                       | N-acetylleucine                     |
| daidzein                         | sphinganine                                        | diethanolamine                      |
| <b>Module 12</b>                 | <b>Module 17</b>                                   | phenylacetate                       |
| caprate (10:0)                   | pterin                                             | 2-acetamidobutanoate                |
| myristoleate (14:1n5)            | pimelate (heptanedioate)                           | phenylacetylphenylalanine           |
| 5-dodecenoate (12:1n7)           | undecanedioate                                     | N-acetyltyrosine                    |
| laurate (12:0)                   | suberate (octanedioate)                            | 2-methylbutyrylphenylalanine        |
| myristate (14:0)                 | azelate (nonanedioate)                             | N-propionylalanine                  |
| phytate                          | adipate                                            | N-acetylisoleucine                  |
| undecanoate (11:0)               | diglycerol                                         | N-methylalanine                     |
| pristanate                       | pyridoxal                                          | tyrosol                             |
| <b>Module 13</b>                 | sebacate (decanedioate)                            | butyrylglycine                      |
| behenoylcarnitine (C22)*         | O-acetylhomoserine                                 | 3-(2-hydroxyphenyl)propionate       |
| piperine                         | 3-methylglutaconate                                | N-formylanthranilic acid            |
| arachidoylcarnitine (C20)*       | 6-oxopiperidine-2-carboxylate                      | propionylglycine                    |
| nervonoylcarnitine (C24:1)*      | 3-hydroxysuberate                                  | norvaline                           |
| lignoceroylcarnitine (C24)*      | N-methylpipercolate                                | <b>Module 21</b>                    |
| behenoyl ethanolamide (22:0)*    | N-trimethyl 5-aminovalerate                        | 1-stearoyl-GPE (18:0)               |
| cerotoylcarnitine (C26)*         | glutarate (pentanedioate)                          | 1-stearoyl-GPG (18:0)               |
| 2-methylmalonylcarnitine (C4-DC) | 3-hydroxybutyrylcarnitine (2)                      | 1-palmitoyl-GPG (16:0)*             |
| <b>Module 14</b>                 | methylsuccinate                                    | 1-stearoyl-GPS (18:0)*              |
| 2-piperidinone                   | dodecanedioate                                     | 1-palmitoyl-GPE (16:0)              |
| trimethylamine N-oxide           | <b>Module 18</b>                                   | glycerophosphoethanolamine          |
| 2-aminoadipate                   | 3-(3-hydroxyphenyl)propionate sulfate              | 1-palmitoyl-GPI (16:0)              |
| 5-aminovalerate                  | 3-(3-hydroxyphenyl)propionate                      | 1-(1-enyl-palmitoyl)-GPE (P-16:0)*  |
| phenethylamine                   | 3-hydroxycinnamate                                 | 1-stearoyl-GPI (18:0)               |
| N-acetyltryptophan               | 4-hydroxycinnamate                                 | 1-(1-enyl-stearoyl)-GPE (P-18:0)*   |
|                                  | 3-(4-hydroxyphenyl)propionate                      | 1-oleoyl-GPE (18:1)                 |

**Table E2 (Continued)**

| <b>Module 22</b>                           | <b>Module 26</b>                   | <b>Module 26 (Continued)</b>              |
|--------------------------------------------|------------------------------------|-------------------------------------------|
| 3-hydroxypyridine                          | cysteine s-sulfate                 | proline                                   |
| 3,5-dihydroxybenzoic acid                  | homocitrulline                     | 1-methyl-beta-carboline-3-carboxylic acid |
| 3-methyladipate                            | cis-4-hydroxycyclohexylacetic acid | aspartate                                 |
| N-acetylcysteine                           | 1-methylurate                      | picolinate                                |
| quinolinate                                | N-acetylglucosaminylasparagine     | cis-urocanate                             |
| dimethylmalonic acid                       | pyr-leu*                           | N-acetylserine                            |
| 3-methylglutarate/2-methylglutarate        | N-acetylarginine                   | 4-acetamidobenzoate                       |
| biotin                                     | levulinate (4-oxovalerate)         | cysteine sulfinic acid                    |
| N-methylproline                            | glutamine                          | riboflavin (Vitamin B2)                   |
| enterolactone                              | glycylvaline                       | gamma-glutamyl-epsilon-lysine             |
| carboxyethyl-GABA                          | N-acetylasparagine                 | mevalonolactone                           |
| hydantoin-5-propionic acid                 | serine                             | N-acetylmethionine sulfoxide              |
| pipecolate                                 | cystine                            | glutamate                                 |
| serotonin                                  | tryptophan                         | N-acetylhistidine                         |
| ethylmalonate                              | N-acetylglutamine                  | 10-undecenoate (11:1n1)                   |
| 2,3-dimethylsuccinate                      | 3-hydroxy-2-ethylpropionate        | ribose                                    |
| <b>Module 23</b>                           | o-Tyrosine                         | pyridoxamine                              |
| 1-methylguanidine                          | biocytin                           | N2-acetyllysine                           |
| ectoine                                    | glycylisoleucine                   | beta-hydroxyisovalerate                   |
| 1-methylimidazoleacetate                   | 3-sulfo-L-alanine                  | N-delta-acetyloronithine                  |
| 3-methylhistidine                          | N-formylmethionine                 | 2-methylserine                            |
| N-acetyl-3-methylhistidine*                | N-alpha-acetyloronithine           | alanine                                   |
| anserine                                   | histidine                          | <b>Module 27</b>                          |
| <b>Module 24</b>                           | cysteine                           | glycodeoxycholate                         |
| gluconate                                  | indoleacetate                      | linolenoylcarnitine (C18:3)*              |
| tricarballoylate                           | threonine                          | deoxycholate                              |
| gulonate*                                  | N6-formyllysine                    | dehydrolithocholate                       |
| N-acetylaspartate (NAA)                    | pyridoxate                         | 6-oxolithocholate                         |
| protoporphyrin IX                          | kynurenine                         | lithocholate                              |
| phosphate                                  | pyroglutamine*                     | <b>Module 28</b>                          |
| 3-carboxyadipate                           | phenylalanine                      | kynurenate                                |
| gamma-glutamylglutamate                    | ornithine                          | N-acetylglutamate                         |
| glycerol 3-phosphate                       | N6-acetyllysine                    | oleanolate                                |
| galactonate                                | lysine                             | gamma-glutamyl-alpha-lysine               |
| methylphosphate                            | acetylcarnitine (C2)               | gamma-glutamyltyrosine                    |
| aconitate [cis or trans]                   | methionine sulfoxide               | gamma-glutamylmethionine                  |
| 2-methylcitrate/homocitrate                | citrulline                         | 4-hydroxycyclohexylcarboxylic acid        |
| oxalate (ethanedioate)                     | N-propionylmethionine              | gamma-glutamylglycine                     |
| flavin mononucleotide (FMN)                | N-acetylmethionine                 | 5-oxoproline                              |
| citrate                                    | tyrosine                           | gamma-glutamylleucine                     |
| <b>Module 25</b>                           | methionine sulfone                 | gamma-glutamylglutamine                   |
| enterodiol                                 | leucine                            | gamma-glutamylalanine                     |
| linoleate (18:2n6)                         | isoleucine                         | gamma-glutamylthreonine                   |
| 2-oleoylglycerol (18:1)                    | beta-guanidinopropanoate           | gamma-glutamylphenylalanine               |
| glycerol                                   | spermidine                         | gamma-glutamylisoleucine*                 |
| linolenate [alpha or gamma; (18:3n3 or 6)] | N-acetyllysine                     | <b>Module 29</b>                          |
| sinapate                                   | glycine                            | piperidine                                |
| 1-oleoylglycerol (18:1)                    | valine                             | cadaverine                                |
| 1-linoleoylglycerol (18:2)                 | methionine                         | histamine                                 |
| 2-linoleoylglycerol (18:2)                 | N-methyl-GABA                      | N-acetyl-cadaverine                       |
| caffeate                                   | allo-threonine                     | 1-methylhistamine                         |
| 1-linolenoylglycerol (18:3)                | 2'-O-methyluridine                 | Tyramine                                  |
| 1-palmitoleoylglycerol (16:1)*             | succinimide                        |                                           |
| choline phosphate                          | trans-urocanate                    |                                           |

**Table E2 (Continued)**

| <b>Module 30</b>                   | <b>Module 33</b>                                 | <b>Module 39</b>                              |
|------------------------------------|--------------------------------------------------|-----------------------------------------------|
| N1-Methyl-2-pyridone-5-carboxamide | glycyrretinate                                   | 3,7-dimethylurate                             |
| alpha-CEHC                         | LAHSA (18:2/OH-18:0)*                            | 7-methylurate                                 |
| phytosphingosine                   | OAHA (18:1/OH-18:0)*                             | (R)-salsolinol                                |
| N6-carboxyethyllysine              | PAHSA (16:0/OH-18:0)                             | 3-methylurate*                                |
| tryptamine                         | alpha-tocotrienol                                | 3-methylxanthine                              |
| ursodeoxycholate                   | gamma-tocotrienol                                | theobromine                                   |
| ursocholate                        | <b>Module 34</b>                                 | m-tyramine                                    |
| deoxycarnitine                     | trigonelline (N'-methylnicotinate)               | <b>Module 40</b>                              |
| hyocholate                         | 4-acetamidobutanoate                             | palmitoleate (16:1n7)                         |
| 4-hydroxyhippurate                 | N2,N5-diacetylornithine                          | oleate/vaccenate (18:1)                       |
| androsterone sulfate               | 2-pyrrolidinone                                  | docosadienoate (22:2n6)                       |
| gamma-CEHC                         | <b>Module 35</b>                                 | N-palmitoylserine                             |
| isoursodeoxycholate                | 17alpha-hydroxypregnenolone 3-sulfate            | hexadecadienoate (16:2n6)                     |
| N6-carboxymethyllysine             | ursodeoxycholate sulfate (1)                     | palmitate (16:0)                              |
| 2-hydroxydecanoate                 | 5alpha-pregnan-3beta,20beta-diol monosulfate (1) | eicosenoate (20:1)                            |
| <b>Module 31</b>                   | 11-ketoetiocolanolone sulfate                    | trans-nonadecenoate (tr 19:1)*                |
| 3-hydroxyphenylacetate             | cholate sulfate                                  | 10-hydroxystearate                            |
| lactobionate                       | pregnanolone/allopregnanolone sulfate            | 15-methylpalmitate                            |
| 2-(4-hydroxyphenyl)propionate      | l-urobilinogen                                   | N-palmitoylglycine                            |
| argininate*                        | bilirubin (E,Z or Z,E)*                          | dihomo-linoleate (20:2n6)                     |
| myo-inositol                       | D-urobilin                                       | 13-methylmyristate                            |
| cytosine                           | <b>Module 36</b>                                 | oleoyl-arachidonoyl-glycerol (18:1/20:4) [1]* |
| tryptophan betaine                 | isovalerylglycine                                | nonadecanoate (19:0)                          |
| nicotinate                         | 2-methylbutyrylglycine                           | margarate (17:0)                              |
| 3-deoxyoctulosonate                | isobutyrylglycine                                | 17-methylstearate                             |
| gamma-glutamylhistidine            | N-formylphenylalanine                            | arachidate (20:0)                             |
| indolepropionate                   | <b>Module 37</b>                                 | erucate (22:1n9)                              |
| xanthurenate                       | N-acetyl-beta-glucosaminylamine                  | stearate (18:0)                               |
| 1-methylxanthine                   | tryptophylglycine                                | <b>Module 41</b>                              |
| pantothenate                       | lysylleucine                                     | urate                                         |
| arabitol/xylitol                   | uridine-2',3'-cyclic monophosphate               | S-1-pyrroline-5-carboxylate                   |
| pyruvate                           | 1-methylnicotinamide                             | guanidinosuccinate                            |
| mannitol/sorbitol                  | leucylglycine                                    | formiminoglutamate                            |
| hypoxanthine                       | alanylleucine                                    | N-methylleucine                               |
| glycerophosphoglycerol             | leucylglutamine*                                 | p-hydroxybenzaldehyde                         |
| gentisate                          | threonylphenylalanine                            | 4-ureidobutyrate                              |
| lactate                            | glycylleucine                                    | N6-methyladenosine                            |
| <b>Module 32</b>                   | histidylalanine                                  | allantoin                                     |
| 2,3-dihydroxy-2-methylbutyrate     | R-mevalonate 5-diphosphate                       | phenylpyruvate                                |
| cysteinylglycine                   | valylleucine                                     | 3-ketosphinganine                             |
| 3-hydroxybutyrate (BHBA)           | isoleucylglycine                                 | 4-imidazoleacetate                            |
| N6,N6,N6-trimethyllysine           | valylglutamine                                   | alpha-ketobutyrate                            |
| 6-hydroxynicotinate                | phenylalanylalanine                              | N-methyltryptophan                            |
| 3,4-dihydroxyphenylacetate         | phenylalanylglycine                              | 3-methyl-2-oxobutyrate                        |
| N-acetylhistamine                  | leucylalanine                                    | 4-hydroxyphenylpyruvate                       |
| 3-hydroxyvalerate                  | valylglycine                                     | 4-methylthio-2-oxobutanoate                   |
| N1,N12-diacetylspermine            | glutaminylleucine                                | N-acetylserotonin                             |
| N(1)-acetylspermine                | nicotinamide riboside                            | retinol (Vitamin A)                           |
| S-carboxymethyl-L-cysteine         | <b>Module 38</b>                                 | 3-methyl-2-oxovalerate                        |
| N(1)-acetylspermidine              | 3-ureidopropionate                               | 4-methyl-2-oxopentanoate                      |
| N-acetylputrescine                 | 3-aminoisobutyrate                               | indole-3-carboxylic acid                      |
| N-monomethylarginine               | 5,6-dihydrothymine                               | alpha-ketoglutarate                           |
| putrescine                         | beta-alanine                                     | methyl indole-3-acetate                       |
| dimethylarginine (SDMA + ADMA)     | N-acetyl-beta-alanine                            |                                               |

**Table E2 (Continued)**

| <b>Module 42</b>                           | <b>Module 47</b>                          | <b>Module 52</b>                                  |
|--------------------------------------------|-------------------------------------------|---------------------------------------------------|
| palmitoylcarnitine (C16)                   | pyrraline                                 | indolin-2-one                                     |
| stearoylcarnitine (C18)                    | phenylacetylglutamine                     | nicotinamide                                      |
| oleoylcarnitine (C18:1)                    | guanidinoacetate                          | sitostanol                                        |
| myristoylcarnitine (C14)                   | 5-hydroxylysine                           | brilliant blue FCF (blue 1)                       |
| palmitoleoylcarnitine (C16:1)*             | N-acetylpyrraline                         | coprostanol                                       |
| 3-methylglutaryl carnitine (2)             | N-(2-furoyl)glycine                       | sucralose                                         |
| succinylcarnitine (C4-DC)                  | creatine                                  | gamma-tocopherol/beta-tocopherol                  |
| linoleoylcarnitine (C18:2)*                | hippurate                                 | saccharopine                                      |
| carnitine                                  | dimethylglycine                           | harmane                                           |
| <b>Module 43</b>                           | N-methylhydantoin                         | 5-hydroxyhexanoate                                |
| thioproline                                | trans-4-hydroxyproline                    | delta-tocopherol                                  |
| imidazole propionate                       | N-acetyl-1-methylhistidine*               | 2-hydroxymyristate                                |
| 2-keto-3-deoxy-gluconate                   | sarcosine                                 | 5alpha-pregnan-3beta,20alpha-diol monosulfate (1) |
| ribitol                                    | acisoga                                   | tyramine O-sulfate                                |
| 2-hydroxy-3-methylvalerate                 | betaine                                   | orotate                                           |
| succinylglutamine                          | carnosine                                 | 2-hydroxypalmitate                                |
| succinate                                  | creatinine                                | dihydroorotate                                    |
| alpha-hydroxyisocaproate                   | benzoate                                  | pentadecanoate (15:0)                             |
| 3-(4-hydroxyphenyl)lactate                 | 1-methylhistidine                         | 4-cholesten-3-one                                 |
| phenylacetyl glycine                       | <b>Module 48</b>                          | 2-hydroxybehenate                                 |
| alpha-hydroxyisovalerate                   | N-acetylneuraminate                       | 2-hydroxystearate                                 |
| 2-hydroxyglutarate                         | N-acetylglucosamine/N-acetylgalactosamine | L-urobilin                                        |
| phenyllactate (PLA)                        | erythrose                                 | N-carbamoylaspartate                              |
| 2-hydroxybutyrate/2-hydroxyisobutyrate     | fucose                                    | N-methylphenylalanine                             |
| N-acetylcitrulline                         | <b>Module 49</b>                          | thiamin (Vitamin B1)                              |
| N-acetylthreonine                          | 1-myristoylglycerol (14:0)                | triethanolamine                                   |
| indolelactate                              | 2-palmitoylglycerol (16:0)                | alpha-tocopherol                                  |
| phenylacetylglutamate                      | 1-palmitoylglycerol (16:0)                | <b>Module 53</b>                                  |
| <b>Module 44</b>                           | 1-pentadecanoylglycerol (15:0)            | cholesterol                                       |
| 3-hydroxylaurate                           | 1-margaroylglycerol (17:0)                | hexadecanedioate                                  |
| 3-hydroxydecanoate                         | <b>Module 50</b>                          | campesterol                                       |
| 3-hydroxymyristate                         | 1-palmitoyl-GPC (16:0)                    | stigmasterol                                      |
| 3-hydroxyoctanoate                         | 1-palmitoyl-2-oleoyl-GPC (16:0/18:1)      | desmosterol                                       |
| <b>Module 45</b>                           | 1-stearoyl-GPC (18:0)                     | beta-sitosterol                                   |
| theophylline                               | choline                                   | 3-hydroxysebacate                                 |
| paraxanthine                               | 1-oleoyl-GPC (18:1)                       | <b>Module 54</b>                                  |
| 1,3-dimethylurate                          | 1-palmitoyl-2-linoleoyl-GPC (16:0/18:2)   | heptanoate (7:0)                                  |
| 5-acetylamino-6-formylamino-3-methyluracil | glycerophosphoinositol*                   | caproate (6:0)                                    |
| 1,7-dimethylurate                          | 1-linoleoyl-GPC (18:2)                    | valerate                                          |
| 1,3,7-trimethylurate                       | 1-linoleoyl-GPE (18:2)*                   | isovalerate                                       |
| 5-acetylamino-6-amino-3-methyluracil       | <b>Module 51</b>                          | caprylate (8:0)                                   |
| <b>Module 46</b>                           | ribonate                                  | isocaproate                                       |
| docosapentaenoate (n6 DPA; 22:5n6)         | N-acetyl-aspartyl-glutamate (NAAG)        |                                                   |
| octadecenedioate (C18:1-DC)                | glycerate                                 |                                                   |
| docosapentaenoate (n3 DPA; 22:5n3)         | 4-hydroxyglutamate                        |                                                   |
| docosahexaenoate (DHA; 22:6n3)             | imidazole lactate                         |                                                   |
| dihomo-linolenate (20:3n3 or n6)           | sulfate*                                  |                                                   |
| eicosapentaenoate (EPA; 20:5n3)            | arabonate/xylonate                        |                                                   |
| adrenate (22:4n6)                          | maleate                                   |                                                   |
| arachidonate (20:4n6)                      | fucitol                                   |                                                   |
| mead acid (20:3n9)                         | erythronate*                              |                                                   |
|                                            | threonate                                 |                                                   |

**Table E3. Members of modules of highly-correlated metabolites that were inversely associated with asthma at age 3 years.**

| <b>Diacylglycerol Module</b>                          | <b>Endocannabinoid Module</b>   | <b>Polyunsaturated Fatty Acids Module</b> |
|-------------------------------------------------------|---------------------------------|-------------------------------------------|
| palmitoyl-oleoyl-glycerol (16:0/18:1) [2]*            | 5-methylthioadenosine (MTA)     | Docosapentaenoate (n6 DPA)                |
| oleoyl-oleoyl-glycerol (18:1/18:1) [2]*               | oleoyl ethanolamide             | Octadecenedioate                          |
| diacylglycerol (14:0/18:1, 16:0/16:1) [1]*            | linoleoyl ethanolamide          | Docosapentaenoate (n3 DPA)                |
| oleoyl-oleoyl-glycerol (18:1/18:1) [1]*               | stearoyl ethanolamide           | Docosahexaenoate (DHA)                    |
| palmitoyl-oleoyl-glycerol (16:0/18:1) [1]*            | palmitoyl ethanolamide          | Dihomo-linolenate (n3 or n6)              |
| diacylglycerol (16:1/18:2 [2], 16:0/18:3 [1])*        | arachidoyl ethanolamide (20:0)* | Eicosapentaenoate (EPA)                   |
| diacylglycerol (12:0/18:1, 14:0/16:1, 16:0/14:1) [2]* | erucoyl ethanolamide (22:1)*    | Adrenate                                  |
| diacylglycerol (12:0/18:1, 14:0/16:1, 16:0/14:1) [1]* | margaroyl ethanolamide*         | Arachidonate                              |
| oleoyl-linoleoyl-glycerol (18:1/18:2) [1]             | 9,10-DiHOME                     | Mead acid                                 |
| linoleoyl-linolenoyl-glycerol (18:2/18:3) [2]*        | 12,13-DiHOME                    |                                           |
| linoleoyl-linoleoyl-glycerol (18:2/18:2) [1]*         | daidzein                        |                                           |
| linoleoyl-linoleoyl-glycerol (18:2/18:2) [2]*         |                                 |                                           |
| palmitoyl-linolenoyl-glycerol (16:0/18:3) [2]*        |                                 |                                           |
| palmitoyl-linoleoyl-glycerol (16:0/18:2) [1]*         |                                 |                                           |
| palmitoleoyl-linoleoyl-glycerol (16:1/18:2) [1]*      |                                 |                                           |
| linolenoyl-linolenoyl-glycerol (18:3/18:3) [2]*       |                                 |                                           |
| oleoyl-linoleoyl-glycerol (18:1/18:2) [2]             |                                 |                                           |
| diacylglycerol (14:0/18:1, 16:0/16:1) [2]*            |                                 |                                           |
| oleoyl-linolenoyl-glycerol (18:1/18:3) [2]*           |                                 |                                           |
| linolenoyl-linolenoyl-glycerol (18:3/18:3) [1]*       |                                 |                                           |
| 13-HODE + 9-HODE                                      |                                 |                                           |
| Tartarate                                             |                                 |                                           |
| palmitoyl-linoleoyl-glycerol (16:0/18:2) [2]*         |                                 |                                           |
| 13-HOTrE                                              |                                 |                                           |

\*Indicates compounds with annotations that have not been officially confirmed based on a standard.



**Table E4. Asthma-associated fecal metabolites associated with exclusive breastfeeding for the first 4 months of life.**

| Metabolite                                           | Association with Breastfeeding |         | Association with Asthma |         | Mediation Analysis Results* |                               |
|------------------------------------------------------|--------------------------------|---------|-------------------------|---------|-----------------------------|-------------------------------|
|                                                      | Beta (95% CI)                  | p value | OR (95% CI)             | p value | P value for indirect effect | Estimated proportion mediated |
| Xylose                                               | 0.23<br>(0.04, 0.42)           | 0.02    | 0.66<br>(0.47, 0.94)    | 0.02    | <b>0.04</b>                 | 11.1%                         |
| P-cresol sulfate                                     | 0.25<br>(0.05, 0.45)           | 0.01    | 0.56<br>(0.40, 0.79)    | 0.001   | <b>0.02</b>                 | 17.3%                         |
| O-sulfo-L-tyrosine                                   | 0.24<br>(0.03, 0.45)           | 0.02    | 0.67<br>(0.48, 0.92)    | 0.01    | 0.06                        | 10.9%                         |
| 17 $\alpha$ -hydroxypregnenolone 3-sulfate           | 0.27<br>(0.04, 0.49)           | 0.02    | 0.63<br>(0.47, 0.85)    | 0.002   | <b>0.03</b>                 | 15.5%                         |
| Galactosylglycerol                                   | 0.27<br>(0.06, 0.48)           | 0.01    | 0.65<br>(0.46, 0.90)    | 0.01    | <b>0.04</b>                 | 12.6%                         |
| linoleoyl-linolenoyl-glycerol (18:2/18:3) [2]        | 0.32<br>(0.08, 0.56)           | 0.01    | 0.74<br>(0.55, 0.97)    | 0.03    | 0.13                        | 9.0%                          |
| diacylglycerol (14:0/18:1, 16:0/16:1 [1])            | 0.32<br>(0.13, 0.51)           | 0.001   | 0.61<br>(0.43, 0.85)    | 0.004   | <b>0.01</b>                 | 20.6%                         |
| diacylglycerol (16:1/18:2 [2], 16:0/18:3 [1])        | 0.30<br>(0.08, 0.53)           | 0.01    | 0.71<br>(0.53, 0.94)    | 0.02    | 0.08                        | 11.0%                         |
| diacylglycerol (12:0/18:1, 14:0/16:1, 16:0/14:1) [1] | 0.31<br>(0.12, 0.50)           | 0.001   | 0.53<br>(0.32, 0.82)    | 0.01    | <b>0.01</b>                 | 22.3%                         |
| diacylglycerol (12:0/18:1, 14:0/16:1, 16:0/14:1) [2] | 0.44<br>(0.12, 0.50)           | 0.0004  | 0.61<br>(0.43, 0.85)    | 0.004   | <b>0.03</b>                 | 23.2%                         |
| oleoyl-oleoyl-glycerol (18:1/18:1) [2]               | 0.27<br>(0.02, 0.52)           | 0.03    | 0.68<br>(0.52, 0.88)    | 0.004   | <b>0.05</b>                 | 13.1%                         |
| palmitoyl-oleoyl-glycerol (16:0/18:1) [1]            | 0.21<br>(0.01, 0.42)           | 0.04    | 0.59<br>(0.42, 0.83)    | 0.002   | 0.05                        | 12.8%                         |

Beta effect estimates are from linear regression analyses of the association of breastfeeding with asthma-associated metabolites (n = 45 metabolites), adjusted for sex, race/ethnicity, study center, maternal education, gestational age, perinatal antibiotics, mode of delivery, and VDAART trial treatment assignment. Odds ratios for associations with asthma are from logistic regression analyses adjusted for sex, race/ethnicity, study center, maternal education and gestational age.

\*Results of mediation analyses to evaluate statistical significance of the indirect effect of breastfeeding on asthma that is mediated by each metabolite; and to estimate the proportion of the association of breastfeeding with asthma that is mediated by each metabolite.

**Table E5. Canonical loadings for bacterial taxa with non-zero loadings in sparse canonical correlation analysis of intestinal metabolites with intestinal bacterial taxa.** Loadings for the analysis including individual metabolites are extremely similar to those for the analysis including groups of highly correlated metabolites (Pearson rho of canonical loadings = 0.99,  $p < 0.0001$ ,  $n = 273$  subjects).

| Bacterial Taxa                                 | Canonical Loading      |                                   |
|------------------------------------------------|------------------------|-----------------------------------|
|                                                | Individual Metabolites | Modules of Correlated Metabolites |
| <i>Roseburia</i> spp                           | -0.21                  | -0.22                             |
| <i>Veillonella</i> dispar                      | -0.09                  | -0.11                             |
| Aerococcaceae spp                              | -0.07                  | -0.09                             |
| <i>Corynebacterium</i> spp                     | 0.01                   | 0.01                              |
| <i>Streptococcus</i> luteciae                  | 0.02                   | 0.01                              |
| <i>Megamonas</i> spp                           | 0.02                   | -0.002                            |
| Enterobacteriaceae spp                         | 0.03                   | 0.02                              |
| <i>Bacteroides</i> eggerthii                   | 0.04                   | 0.03                              |
| <i>Bifidobacterium</i> animalis                | 0.04                   | 0.03                              |
| <i>Solibacillus</i> spp                        | 0.05                   | 0.04                              |
| <i>Pseudoramibacter</i> <i>Eubacterium</i> spp | 0.06                   | 0.06                              |
| <i>Bacteroides</i> uniformis                   | 0.07                   | 0.06                              |
| <i>Paraprevotella</i> spp                      | 0.08                   | 0.07                              |
| <i>Prevotella</i> spp                          | 0.09                   | 0.08                              |
| <i>Pyramidobacter</i> piscolens                | 0.13                   | 0.14                              |
| <i>Megasphaera</i> spp                         | 0.15                   | 0.12                              |
| <i>Bifidobacterium</i> bifidum                 | 0.16                   | 0.14                              |
| <i>Slackia</i> spp                             | 0.17                   | 0.17                              |
| <i>Desulfovibrio</i> D168                      | 0.2                    | 0.18                              |
| <i>Adlercreutzia</i> spp                       | 0.21                   | 0.22                              |
| <i>Bifidobacterium</i> adolescentis            | 0.21                   | 0.2                               |
| SHA-98 spp                                     | 0.21                   | 0.24                              |
| <i>Butyricimonas</i> spp                       | 0.26                   | 0.24                              |
| <i>Collinsella</i> aerofaciens                 | 0.27                   | 0.24                              |
| <i>Parabacteroides</i> spp                     | 0.27                   | 0.24                              |
| <i>Christensenella</i> spp                     | 0.31                   | 0.31                              |
| <i>Oxalobacter</i> formigenes                  | 0.33                   | 0.32                              |
| Rikenellaceae spp                              | 0.33                   | 0.35                              |
| Christensenellaceae spp                        | 0.35                   | 0.40                              |

**Table E6. Pearson rhos for correlations of plasma lipid summary measures with intestinal lipid metabolite module eigenvalues.** Intestinal lipid module eigenvalues were generated by network analysis to identify modules of highly-correlated intestinal metabolites. Plasma lipid summary measures were generated by summing relative abundances of total PUFA (13 metabolites), omega-3 PUFA (5 metabolites), omega-6 PUFA (6 metabolites), endocannabinoid (6 metabolites) and diacylglycerol (19 metabolites) metabolites.

| <b>Intestinal Metabolite Module</b> | <b>Plasma Metabolite Summary Measure</b> | <b>Number of Subjects</b> | <b>Pearson Rho</b> | <b><i>p</i> value</b> |
|-------------------------------------|------------------------------------------|---------------------------|--------------------|-----------------------|
| PUFA                                | Total PUFA                               | 156                       | -0.02              | 0.77                  |
| PUFA                                | Omega-3 PUFA                             | 156                       | 0.01               | 0.86                  |
| PUFA                                | Omega-6 PUFA                             | 156                       | -0.06              | 0.48                  |
| Diacylglycerol                      | Diacylglycerol                           | 156                       | 0.04               | 0.61                  |
| Endocannabinoid                     | Endocannabinoid                          | 233                       | -0.06              | 0.40                  |

Abbreviations: PUFA – polyunsaturated fatty acid

**Table E7. Canonical loadings for foods with non-zero loadings in sparse canonical correlation analysis of intestinal metabolites with diet at age 3 years.** Loadings for the analysis including individual metabolites are similar to those for the analysis including groups of highly correlated metabolites (Pearson rho of canonical loadings = 0.86,  $p = 0.01$ ,  $n = 338$  subjects).

| <b>Food</b>                      | <b>Canonical Loading</b>      |                                          |
|----------------------------------|-------------------------------|------------------------------------------|
|                                  | <b>Individual Metabolites</b> | <b>Modules of Correlated Metabolites</b> |
| Fried chicken or chicken nuggets | 0.58                          | 0.54                                     |
| Hamburger or meatballs           | 0.39                          | 0.43                                     |
| Hot dogs                         | 0.39                          | 0.48                                     |
| Beef (steak or roast)            | 0.36                          | 0.45                                     |
| Corn                             | 0.32                          | 0.22                                     |
| Potatoes (baked, boiled, mashed) | 0.26                          | 0.14                                     |
| Sausage                          | 0.24                          | 0.15                                     |

## 1 **SUPPLEMENTAL METHODS**

### 2 **Study Design**

3 Stool samples were analyzed from offspring of participants in VDAART, a randomized, double-  
4 blind, placebo-controlled trial of Vitamin D supplementation during pregnancy for prevention of  
5 asthma and other allergic disease in offspring (NCT00920621)(S1, S2). VDAART participants  
6 were recruited during the 10<sup>th</sup> to 18<sup>th</sup> weeks of pregnancy from study centers in Boston, St.  
7 Louis and San Diego, United States. Participants were randomized to daily 4,400 IU (treatment  
8 arm) or 400 IU (usual care) of vitamin D during pregnancy. VDAART offspring were at elevated  
9 risk for developing asthma and other allergic diseases, as either their biologic mother or father  
10 had a history of asthma, eczema or allergic rhinitis by study design. All participants were non-  
11 smokers. The study protocol was approved by the institutional review boards at each  
12 participating institution and at Brigham and Women's Hospital. All participants provided  
13 written informed consent. A flow diagram is displayed in **Figure 1**.

14

### 15 **Outcome Ascertainment and Other Variables**

16 The asthma outcome was based on parental report of physician diagnosis of asthma in the  
17 child's first 3 years of life. Parents were queried about asthma diagnosis regularly for the first 3  
18 years of life by telephone every 3 months and at annual in-person visits. Other characteristics  
19 analyzed included child sex, race/ethnicity, study center, maternal education, and household  
20 income. Data collected at birth included maternal antibiotics during delivery or child antibiotics  
21 after delivery, mode of delivery and gestational age. Parental questionnaire responses were  
22 used to determine whether the child was exclusively breastfed for the first 4 months of life,

23 presence of a pet dog in the home during infancy, day care attendance, diagnosis of eczema by  
24 a health care provider, and whether inhaled (by inhaler or nebulizer) or systemic (oral or  
25 injected) steroids had been used in the 3 months prior to turning 3 years old. Blood samples  
26 collected at age 3 years were used to measure total IgE and serum specific IgE to common food  
27 and environmental allergens: egg white, milk, peanut, soybean, wheat, walnut, *Alternaria*  
28 *alternata*, *Dermatophagoides farinae*, *Dermatophagoides pteronyssinus*, German cockroach,  
29 cat dander, dog dander, grass pollen mix, and tree pollen mix. BMI at age 3 years was based on  
30 study visit measurements.

31

### 32 **Metabolomic Profiling**

33 Mass spectrometer platforms, sample extraction and preparation, instrument settings and  
34 conditions and data handling were performed at Metabolon, Inc. (Research Triangle Park, NC)  
35 and have been described previously in detail(S3). The major components of the process are  
36 summarized briefly as follows: The sample preparation process was carried out using an  
37 automated MicroLab STAR® system (Hamilton, Reno, NV). Recovery standards were added prior  
38 to the first step in the extraction process for quality control purposes. Homogenized fecal  
39 samples were methanol extracted on a normalized per mass basis for non-targeted metabolic  
40 profiling. Each sample was dried under vacuum to remove the organic solvent. Biochemical  
41 levels were measured using ultra-performance liquid chromatography coupled with tandem  
42 mass spectrometry (UPLC-MS/MS), as described(S3). The reproducibility of the extraction  
43 protocol was assessed by the recovery of the xenobiotic compounds supplemented in every  
44 sample prior to extraction. Identification of known chemical entities was based on comparison

45 to metabolomic library entries of purified standards based on chromatographic properties and  
46 mass spectra. Of a total of 737 measured and annotated metabolites, 662 (90%) were  
47 annotated based on known standards and the remaining 75 are denoted by an asterisk in  
48 relevant results tables.

49

50 Additional processing of metabolite data was performed using R version 3.4.0. Metabolites with  
51 known chemical identities and interquartile range (IQR) > 0 were analyzed. Intestinal  
52 metabolite relative abundances were normalized to sample mass (mg). Missing values were  
53 replaced with half of the minimum relative abundance observed for that metabolite. Resulting  
54 values were  $\log_{10}$  normalized and *pareto*-scaled (mean-centered and divided by the square root  
55 of the standard deviation). Principal components analysis of metabolite relative abundances  
56 was performed to look for outliers and age trends. One stool sample was over 10 standard  
57 deviations from the mean on principal component (PC) 1 and over 6 standard deviations from  
58 the mean on PC2 and was excluded from analysis.

59

## 60 **Microbiome Profiling**

61 DNA extraction and sequencing of the bacterial 16S V4 hyper-variable region using the Illumina  
62 MiSeq platform (San Diego, CA) were performed at Partners Healthcare Personalized Medicine  
63 (Boston, MA). Approximately 200 mg of stool per sample was resuspended in 1 mL InhibitEX  
64 Buffer from Qiagen QIAamp Fast DNA Stool Mini Kit (Qiagen, Catalogue # 51604) in tubes  
65 containing 0.1 mm silicon beads (Genesee Scientific, Catalogue # 31-212S1). Samples were  
66 disrupted using a Mini-Beadbeater 24 from Biospec Products for 3 minutes. Extraction

67 continued on the contents of the entire tube using the Qiagen QIAamp Fast DNA Stool Mini Kit  
68 automated on a Qiagen QIAcube. Resulting DNA quality control was evaluated using a  
69 PicoGreen assay (Quant-iT dsDNA assay kit, Thermofisher, catalogue number P7589) on a  
70 Gemini XP spectrophotometer from Molecular Devices.

71

72 Input into library construction was 15 ng DNA using NEXTflex 16S V4 Amplicon-Seq kit 2.0 (Bio  
73 Scientific, Catalogue # 4203-04). Finished libraries were normalized to 10 nM using PicoGreen  
74 quantitation and sizing information gathered using a TapeStation D100 screen tapes and  
75 reagents (Agilent, Catalogue # 5067-5582 and 5067-5583). Final quality control was carried out  
76 to establish the amount of library containing ligated Illumina adaptors using KAPA Library  
77 Quantification Kits (KAPA biosystems, Catalogue # KK4824). Up to 288 libraries were pooled to  
78 provide equimolar amounts of each library in the pool, which was then run on Illumina MiSeq  
79 using MiSeq Reagent Kit v3 600 cycle kit (MS-102-3003). Each pool contained a 20% spike-in of  
80 PhiX Control library v3 (Illumina, Catalogue # FC-110-3001) to increase diversity of the library  
81 sequence. FASTQ files were generated on the MiSeq instrument.

82

83 Filtering, trimming, and chimera checking were performed as previously described(S4, S5). We  
84 used closed reference OTU classification in Qiime to group sequences according to sequence  
85 similarity and match to taxonomy(S6). Additional processing of microbiome data was  
86 performed using Phyloseq package for R(S7). Specifically, samples with read counts of less than  
87 1,000 and OTUs that were not seen at least once in at least 5% of samples were excluded. OTUs  
88 with the same species annotation were merged using the tax\_glom function.



89

90 As it was recently shown that quantitative microbiome profiling is preferable to relative  
91 abundance profiling in co-occurrence analyses and in seeking disease associations(S8),  
92 quantitative PCR using universal 16S rRNA primers was performed at Partners Healthcare  
93 Personalized Medicine to estimate total bacterial biomass. A standard curve was generated  
94 using dilutions of commercially available *E. coli* genomic DNA (Affymetrix/USB, ATCC 11303  
95 strain, Santa Clara, CA). Samples with less than 15 ng of total DNA per mL of stool or PCR cycle  
96 threshold value less than 8 or greater than 36 were excluded from analysis, and this accounts  
97 for why the number of stool samples with microbiome profiling is lower than the number of  
98 samples with metabolomic profiling. Species-level taxa relative abundances were converted to  
99 fractional abundances, multiplied by estimated bacterial biomass (in ng/microliter of 16S rRNA  
100 DNA), multiplied by a constant (10,000) and rounded to the nearest whole number for analysis.

101

### 102 **Calorie Intake Ascertainment**

103 We used food frequency questionnaire (FFQ) responses to estimate daily caloric intake.  
104 Nutrient compositions of FFQ items were determined using the Harvard nutrition composition  
105 database, which is based on US Department of Agriculture publications supplemented by other  
106 publications and information from manufacturers(S9–S11). Of the 87 items on the FFQ, 4  
107 (bacon, margarine tub, margarine stick and cereal (cold)) were not in the Harvard nutrient  
108 composition database and nutrient compositions for these foods were obtained from the US  
109 Department of Agriculture Nutrient Database for Standard Reference (Release 28)(S11).  
110 Standard portion sizes were obtained using the US Department of Agriculture What's In the

111 Foods You Eat Search Tool(S12). The portion size associated with the label “quantity not  
112 specified” was selected for each food item except for pizza, for which 119 grams, the portion  
113 size for “1 piece, not further specified,” was selected instead of the “quantity not specified”  
114 portion size of 238 grams.

115

116 For each of the 87 FFQ items, reported food frequencies were converted to estimated number  
117 of daily servings: “Never” was replaced by 0, “< 1 time per week” was replaced with 0.5/7,  
118 “Once per week” was replaced with 1/7, “2-4 times/week” was replaced with 3/7, “Nearly daily  
119 or daily” was replaced with 1, “2-4 times/day” was replaced with 3, “2 or more times/day” was  
120 replaced with 3, and “5 or more times/day” was replaced with 5. Daily intake of calories was  
121 calculated by multiplying the estimated number of daily servings for each food item by the  
122 calorie content in a standard portion of that food item, and then summing the result across all  
123 food items for each subject.

124

## 125 **Statistics**

126 Statistical analyses were conducted using R version 3.5.0 (R Foundation for Statistical  
127 Computing). Baseline characteristics and potential predictors of the early-life intestinal  
128 microenvironment were tabulated and Chi square and *t* tests were used to test for differences  
129 in categorical and continuous characteristics, respectively, by phenotype (asthma vs no  
130 asthma).

131

132 To identify metabolic pathways associated with asthma, we used a network approach to  
133 identify highly correlated metabolites, which are expected to be functionally related, using the  
134 weighted gene correlation network analysis (WGCNA) R package (version 1.61)(S13). WGCNA  
135 identifies modules of highly correlated features in high-dimensional datasets. Signed network  
136 construction was performed using Spearman correlation coefficients and applying a minimum  
137 module size of 4 metabolites and a soft thresholding power of 12 for metabolite networks  
138 (chosen by using the pickSoftThreshold function of the WGCNA R package to achieve a scale-  
139 free topology fitting index > 0.9). Eigenvalues summarizing relative abundances of metabolites  
140 of each metabolite module for each subject were used in subsequent analyses.

141

142 Logistic regression was used to determine the associations of potential predictors of the  
143 intestinal microenvironment (such as perinatal antibiotics), individual metabolites, and  
144 metabolite module eigenvalues with asthma. Covariates in adjusted analyses were selected on  
145 the basis of significant ( $p < 0.05$ ) bivariate associations between these variables and asthma  
146 (**Table 1**) and included sex, race/ethnicity, study center, maternal education and gestational  
147 age. Maternal education and household income were highly correlated (Chi square  $p$  value <  
148 0.01) and both were associated with asthma in bivariate analyses (**Table 1**). Maternal education  
149 was included in adjusted models instead of household income, as over 20% of subjects refused  
150 to report or did not know their household income (**Table 1**). Sensitivity analyses were  
151 performed in which steroid use was added as a covariate to logistic regression models.

152

153 Multivariable linear regression analyses were performed to determine associations between  
154 breastfeeding and asthma-associated metabolites and metabolite modules. Covariates were  
155 selected based on *a priori* knowledge of likely confounders of the breastfeeding-metabolite  
156 association and included sex, race/ethnicity, study center, maternal education, gestational age,  
157 perinatal antibiotics, mode of delivery, and VDAART trial treatment assignment.

158  
159 Plasma metabolite summary scores were generated by summing relative abundances for total  
160 PUFA (13 metabolites), omega-6 PUFA (6 metabolites), omega-3 PUFA (5 metabolites),  
161 endocannabinoids (6 metabolites) and diacylglycerols (19 metabolites). Pearson correlation was  
162 used to analyze the association between plasma summary scores and corresponding intestinal  
163 metabolite module eigenvalues.

164  
165 Mediation analyses were performed for two purposes: (1) to estimate the direct association  
166 between breastfeeding and asthma, and the indirect association mediated through stool  
167 metabolites; and (2) to estimate the direct association between dietary variables and asthma,  
168 and the indirect association mediated through intestinal metabolites. Analyses were adjusted  
169 for sex, race/ethnicity, study center, maternal education and gestational age. Dietary variable  
170 score was log-normalized. Mediation analysis assumes no unmeasured confounding or effect  
171 modification between modeled variables. The R package “mediation” was used and 95%  
172 confidence intervals were based on quasi-Bayesian approximation with 2,000 Monte Carlo  
173 draws(S14).

174

175 All tests were 2-sided and the significance level was pre-specified at  $p < 0.05$ . Given the  
176 exploratory nature of this analysis, adjustments were not made for multiple comparisons unless  
177 otherwise specified.

178

### 179 **Integrative Analyses**

180 Coinertia analysis was performed using the ade4 R package(S15) to compare global associations  
181 of the plasma metabolome, gut microbiome and diet with the intestinal metabolome. This  
182 method identifies successive axes of covariance between two sets of data available for a single  
183 group of subjects. It generates an RV score, which ranges from 0 to 1 with higher scores  
184 indicating greater global similarity between data sets. The RV.rtest function was used to test for  
185 significance of the RV score based on 99 Monte-Carlo simulations. Because the RV score  
186 increases with decreasing sample size(S16), analysis was restricted to subjects with all data  
187 types: intestinal and plasma metabolome, intestinal microbiome and diet (n = 178).

188

189 Sparse canonical correlation analysis was performed using the PMA R package(S17) to identify  
190 features of the intestinal metabolome that are correlated both with features of other data  
191 types (plasma metabolome, intestinal microbiome, diet) and with asthma. This method  
192 estimates the linear relationship between two sets of data from a single group of subjects. For  
193 each pair of data types, a limited number of features were assigned non-zero canonical loadings  
194 on the first canonical variate, which were used to calculate canonical scores for each subject for  
195 each data type. Pearson correlation was used to ensure that canonical scores were indeed  
196 correlated between each pair of data types, and the association of each canonical score with

197 asthma was queried in adjusted logistic regression analyses. Spearman correlation heatmaps of

198 features with non-zero canonical loadings were constructed using R function heatmap.

199

200 **References:**

- 201 S1. Litonjua AA, Carey VJ, Laranjo N, Harshfield BJ, McElrath TF, O'Connor GT, et al. Effect of  
202 Prenatal Supplementation With Vitamin D on Asthma or Recurrent Wheezing in Offspring  
203 by Age 3 Years: The VDAART Randomized Clinical Trial. *JAMA* 2016;315:362–70.
- 204 S2. Litonjua AA, Lange NE, Carey VJ, Brown S, Laranjo N, Harshfield BJ, et al. The Vitamin D  
205 Antenatal Asthma Reduction Trial (VDAART): Rationale, design, and methods of a  
206 randomized, controlled trial of vitamin D supplementation in pregnancy for the primary  
207 prevention of asthma and allergies in children. *Contemp Clin trials* 2014;38:37–50.
- 208 S3. Evans AM, Bridgewater BR, Liu Q, Mitchell MW, Robinson RJ, Dai H, et al. Metabolomics:  
209 Open access high resolution mass spectrometry improves data quantity and quality as  
210 compared to unit mass resolution mass spectrometry in high-throughput profiling  
211 metabolomics. *Metabolomics* 2014;4:1–7.
- 212 S4. Human Microbiome Project Consortium. A framework for human microbiome research.  
213 *Nature* 2012;486:215–21.
- 214 S5. Haas BJ, Gevers D, Earl AM, Feldgarden M, Ward DV, Giannoukos G, et al. Chimeric 16S  
215 rRNA sequence formation and detection in Sanger and 454-pyrosequenced PCR  
216 amplicons. *Genome Res* 2011;21:494–504.
- 217 S6. Caporaso JG, Kuczynski J, Stombaugh J, Bittinger K, Bushman FD, Costello EK, et al. QIIME  
218 allows analysis of high-throughput community sequencing data. *Nat Methods*  
219 2010;7:335–6.
- 220 S7. McMurdie PJ, Holmes S. Phyloseq: An R Package for Reproducible Interactive Analysis  
221 and Graphics of Microbiome Census Data. *PLoS One* 2013;8(4):e61217.

- 222 S8. Vandeputte D, Kathagen G, D’Hoe K, Vieira-Silva S, Valles-Colomer M, Sabino J, et al.  
223 Quantitative microbiome profiling links gut community variation to microbial load.  
224 *Nature* 2017;551:507–511.
- 225 S9. Willett WC, Sampson L, Stampfer MJ, Rosner B, Bain C, Witschi J, et al. Reproducibility  
226 and validity of a semiquantitative food frequency questionnaire. *Am J Epidemiol*  
227 1985;122:51–65.
- 228 S10. Oken E, Kleinman KP, Olsen SF, Rich-Edwards JW, Gillman MW. Associations of seafood  
229 and elongated n-3 fatty acid intake with fetal growth and length of gestation: Results  
230 from a US pregnancy cohort. *Am J Epidemiol* 2004;160:774–783.
- 231 S11. USDA. USDA National Nutrient Database for Standard Reference Release 28.  
232 <https://ndb.nal.usda.gov/ndb/>. May, 2016. Accessed January 2, 2018.
- 233 S12. USDA. What’s In The Foods You Eat Search Tool, 2013-2014.  
234 <https://reedir.arsnet.usda.gov/codesearchwebapp>. Accessed January 2, 2018.
- 235 S13. Langfelder P, Horvath S, Fisher R, Zhou X, Kao M, Wong W, et al. WGCNA: an R package  
236 for weighted correlation network analysis. *BMC Bioinformatics* 2008;9:559.
- 237 S14. Tingley D, Yamamoto T, Hirose K, Keele L, Imai K. mediation: R package for causal  
238 mediation analysis. *J Stat Softw* 2014;59:1–38.
- 239 S15. Dray S, Dufour AB. The ade4 Package: Implementing the duality diagram for ecologists. *J*  
240 *Stat Softw* 2007;22(4):1-20.
- 241 S16. Fruciano C, Franchini P, Meyer A. Resampling-based approaches to study variation in  
242 morphological modularity. *PLoS One* 2013;8(7):e69376.
- 243 S17. Witten DM, Tibshirani R, Hastie T. A penalized matrix decomposition, with applications to



244 sparse principal components and canonical correlation analysis. *Biostatistics*

245 2009;10:515–534.
